# Supplementary material
Source: PubMed Central journal article supplement (PMC7417160)
Supplement: mmc1.pdf [file mmc1.pdf]

# THE LANCET

## Child & Adolescent Health

### Supplementary appendix

This appendix formed part of the original submission. We post it as supplied by the authors.

Supplement to: Sadiq M, Aziz OA, Kazmi U, et al. Multisystem inflammatory syndrome associated with COVID-19 in children in Pakistan. *Lancet Child Adolesc Health* 2020; published online Aug 10. [https://doi.org/10.1016/S2352-4642\(20\)30256-X](https://doi.org/10.1016/S2352-4642(20)30256-X).

**Table 1: Epidemiological, Clinical, Laboratory, Echocardiographic, Management and Outcome of Patients**

| Characteristics                                                | Patient 1     | Patient 2 | Patient 3  | Patient 4  | Patient 5  | Patient 6  | Patient 7  | Patient 8  |       |
|----------------------------------------------------------------|---------------|-----------|------------|------------|------------|------------|------------|------------|-------|
| <b>Epidemiological Characteristics</b>                         |               |           |            |            |            |            |            |            |       |
| Age (Years)                                                    | 11 Y          | 8 Y       | 13 Y       | 7 Y        | 8 Y        | 10 Y       | 10 Y       | 9 Y        |       |
| Sex (M=Male, F=Female)                                         | M             | M         | M          | M          | M          | M          | M          | F          |       |
| Comorbid Conditions                                            | Nil           | Nil       | Nil        | Nil        | Nil        | Nil        | Nil        | Nil        |       |
| <b>Presentation</b>                                            |               |           |            |            |            |            |            |            |       |
| Atypical Kawasaki Disease                                      | Yes           | No        | Yes        | Yes        | Yes        | No         | No         | No         |       |
| Typical Kawasaki Disease                                       | No            | No        | No         | No         | No         | No         | Yes        | Yes        |       |
| MIS-C Criteria                                                 | Yes           | Yes       | Yes        | Yes        | Yes        | Yes        | Yes        | Yes        |       |
| PIMS-TS Criteria                                               | Yes           | Yes       | Yes        | Yes        | Yes        | Yes        | Yes        | Yes        |       |
| <b>Clinical features</b>                                       |               |           |            |            |            |            |            |            |       |
| Fever (Days)                                                   | 7             | 7         | 8          | 5          | 9          | 4          | 7          | 5          |       |
| Body aches                                                     | Present       | Present   | Present    | Present    | -          | Present    | Present    | -          |       |
| Gastrointestinal Symptoms (Abdominal pain, Vomiting, Diarrhea) | Present       | Present   | -          | Present    | Present    | Present    | Present    | -          |       |
| Meningism/Altered Consciousness                                | -             | Present   | -          | -          | Present    | Present    | -          | -          |       |
| Conjunctivitis                                                 | Present       | -         | Present    | Present    | Present    | Present    | Present    | Present    |       |
| Oral mucosal changes (Lips/ Tongue)                            | -             | -         | Present    | -          | Present    | Present    | Present    | Present    |       |
| Cervical Lymphadenopathy                                       | -             | -         | Present    | -          | -          | -          | -          | Present    |       |
| Rash                                                           | Present       | Present   | -          | Present    | -          | -          | Present    | Present    |       |
| Peripheral extremity changes                                   | Present       | -         | -          | -          | -          | -          | Present    | Present    |       |
| Hypotension/Shock                                              | No            | Yes       | No         | No         | No         | Yes        | No         | No         |       |
| Organ-system Involvement: 2 Systems                            | -             | -         | -          | -          | -          | -          | -          | Yes        |       |
| 3 Systems                                                      | Yes           | -         | Yes        | Yes        | -          | -          | Yes        | -          |       |
| ≥ 4 Systems                                                    | -             | Yes       | -          | -          | Yes        | Yes        | -          | -          |       |
| <b>COVID-19 Status</b>                                         |               |           |            |            |            |            |            |            |       |
| RT-PCR for SARS COV 2                                          | Negative      | Not Done  | Positive   | Positive   | Negative   | Negative   | Positive   | Not Done   |       |
| COVID-19 Antibody Assay IgG/Combined                           | Reactive      | Reactive  | Reactive   | Reactive   | Reactive   | Reactive   | Reactive   | Reactive   |       |
| <b>Laboratory Parameters- (Reference Range)</b>                |               |           |            |            |            |            |            |            |       |
| White Cell Count (x10E3/μL)                                    | (4-10.5)      | 11.3      | 37.3       | 9          | 10.1       | 14.2       | 5.4        | 8.9        | 6.49  |
| Neutrophils (%)                                                | (40-60)       | 76        | 88.3       | 50         | 38         | 68         | 88         | 85         | 43.7  |
| Lymphocytes (%)                                                | (20-40)       | 21        | 9.4        | 15         | 52         | 24         | 9.2        | 13         | 42.2  |
| Platelet (x10E3/μL)                                            | (150-400)     | 126       | 109        | 110        | 309        | 88         | 83         | 195        | 356   |
| PT/APTT (Sec)                                                  | (12-16/30-40) | 14.5/32.4 | >120/>120  | 15/29      | 15/29      | >120/>120  | >120/>120  | 16/40.6    | 15/29 |
| C-Reactive Protein (mg/L)                                      | (<0.5)        | 78        | 187.5      | 130        | 57.24      | 173.6      | 61.21      | 89.46      | 10    |
| Ferritin (ng/ml)                                               | (13-350)      | 921       | 867        | 784.4      | 168.9      | 1660.0     | 3000       | 3000       | -     |
| D-Dimers (μg/ml)                                               | (0-0.5)       | 0.8       | 1.2        | <0.5       | 1.7        | 2.0        | 5.247      | 0.8        | -     |
| <b>Echocardiographic Findings</b>                              |               |           |            |            |            |            |            |            |       |
| Coronary Artery Dilation/Aneurysm                              |               |           |            |            |            |            |            |            |       |
| z-score > 2.5                                                  | +4.27         | +2.61     | -          | +3.65      | -          | -          | -          | -          | -     |
| z-score 2-2.5                                                  | -             | -         | +2.12      | -          | -          | +2.06      | -          | -          | -     |
| Ventricular Dysfunction                                        | No            | Present   | No         | No         | No         | Present    | No         | No         |       |
| Pericardial Effusion                                           | No            | Small     | Small      | No         | Small      | Small      | No         | No         |       |
| <b>Treatment</b>                                               |               |           |            |            |            |            |            |            |       |
| Systemic Steroids                                              | No            | Yes       | No         | No         | Yes        | Yes        | No         | No         |       |
| Intravenous Immunoglobulin                                     | Yes           | Yes       | Yes        | Yes        | No         | Yes        | Yes        | No         |       |
| Enoxaparin                                                     | No            | Yes       | No         | No         | Yes        | Yes        | No         | No         |       |
| <b>Hospital Stay</b>                                           |               |           |            |            |            |            |            |            |       |
| Intensive Care Unit Stay (Days)                                | -             | 11        | -          | -          | -          | 6          | -          | -          |       |
| High Dependency Unit/Isolation Stay (Days)                     | 11            | -         | 4          | 10         | 7          | -          | 8          | 2          |       |
| Outcome                                                        | Discharged    | Died      | Discharged | Discharged | Discharged | In Patient | In Patient | Discharged |       |

MIS-C: Multisystem Inflammatory Syndrome in Children, PIMS- TS: Paediatric Multisystem Inflammatory Syndrome–Temporally Associated with SARS-CoV-2, RT-PCR: Reverse transcriptase polymerase chain reaction

**Table 2: Patient Characteristics, Clinical Features, Management and Outcome Of Major Case Series**

| Parameter                       |                                                   | Our Experience Sadiq M et al (MIS-C) | Italian Experience Verdoni L et al <sup>2</sup> (Kawasaki like disease) | UK Experience Davies P et al <sup>9</sup> (PIMS-TS) | France & Switzerland Experience Belhadjer Z et al <sup>4</sup> (MIS-C) | USA Experience Feldstein LR et al <sup>6</sup> (MIS-C) |
|---------------------------------|---------------------------------------------------|--------------------------------------|-------------------------------------------------------------------------|-----------------------------------------------------|------------------------------------------------------------------------|--------------------------------------------------------|
| Total no. Of patients           |                                                   | 8                                    | 10                                                                      | 78                                                  | 35                                                                     | 186                                                    |
| Age: Median (IQR)- year         |                                                   | 9.5 (8-10.5)                         | 7.5 (4-10.5)                                                            | 11 (8-14)                                           | 10 (2-16)                                                              | 8.3 (3.3-12.5)                                         |
| Sex: Male sex- no. (%)          |                                                   | 7 (87.5)                             | 7 (70)                                                                  | 52 (67)                                             | 18 (51)                                                                | 115 (62)                                               |
| Comorbidities- no. (%)          |                                                   | 0 (0)                                | Not available                                                           | 17 (22)                                             | 10 (28)                                                                | 51 (27)                                                |
| Ethnic Background – no. (%)     | Afro-Caribbean/ Black                             | 0 (0)                                | Not available                                                           | 37 (47)                                             | Not available                                                          | 46 (25)                                                |
|                                 | Asian/ other                                      | 8 (100)                              | Not available                                                           | 22 (28)                                             | Not available                                                          | 9 (5)                                                  |
|                                 | Hispanic or Latino                                | 0 (0)                                | Not available                                                           | 0                                                   | Not available                                                          | 57 (31)                                                |
|                                 | White                                             | 0 (0)                                | 8 (80)                                                                  | 17 (22)                                             | Not available                                                          | 35 (19)                                                |
| Type of Presentation - no. (%)  | Classic / Atypical KD                             | 6 (75)                               | 5 (50)                                                                  | 0 (0)                                               | 0 (0)                                                                  | 74 (40)                                                |
|                                 | MIS-C/ PIMS-TS with Shock                         | 2 (25)                               | 5 (50)                                                                  | 68 (87)                                             | 35 (100)                                                               | 112 (60)                                               |
| Clinical Features - no. (%)     | Fever                                             | 8 (100)                              | 10 (100)                                                                | 78 (100)                                            | 35 (100)                                                               | 186 (100)                                              |
|                                 | GI symptoms                                       | 6 (75)                               | 6 (60)                                                                  | 70 (90)                                             | 29 (83)                                                                | 171 (92)                                               |
|                                 | Neurological involvement                          | 3 (37.5)                             | 4 (40)                                                                  | Not available                                       | 11 (31)                                                                | 12 (6.5)                                               |
|                                 | Hypotension/shock                                 | 2 (25)                               | 5 (50)                                                                  | 68 (87)                                             | 28 (80)                                                                |                                                        |
|                                 | Conjunctivitis                                    | 7 (87.5)                             | 8 (80)                                                                  | 23 (29)                                             | 31 (89)                                                                | 103 (55)                                               |
|                                 | Peripheral extremity changes                      |                                      | 7 (70)                                                                  | Not available                                       | Not available                                                          | 69 (37)                                                |
|                                 | Polymorphic rash                                  | 5 (62.5)                             | 8 (80)                                                                  | 35 (45)                                             | 20 (57)                                                                | 110 (59)                                               |
|                                 | Oral mucosal changes                              | 5 (62.5)                             | 6 (60)                                                                  | Not available                                       | 19 (54)                                                                | 78 (42)                                                |
| Echo Findings - no. (%)         | Cervical lymphadenopathy                          | 2 (25)                               | 1 (10)                                                                  | Not available                                       | 21 (60)                                                                | 18 (10)                                                |
|                                 | Ventricular function- LV (Ejection fraction <55%) | 2 (25)                               | 5 (50)                                                                  | Not available                                       | 35 (100)                                                               | 71 (38)                                                |
|                                 | Pericardial effusion                              | 4 (50)                               | 4 (40)                                                                  | Not available                                       | 3 (8)                                                                  | 48 (26)                                                |
|                                 | Coronary abnormalities                            | 5 (62.5)                             | 2 (20)                                                                  | 28 (36)                                             | 6 (17)                                                                 | 15 (9)                                                 |
| SARS-Cov2 - no. (%)             | RT-PCR                                            | 3 (37.5)                             | 2 (20)                                                                  | 17 (22)                                             | 12 (34)                                                                | 73 (41)                                                |
|                                 | Serology (IgG, IgM)                               | 8 (100)                              | 8 (80)                                                                  | 33/35 (42)                                          | 30 (86)                                                                | 58 (31)                                                |
|                                 | Exposure to Covid-19 patient                      | 6 (75)                               | 5 (50)                                                                  | 33 (42)                                             | 13 (35)                                                                | 55 (30)                                                |
| Treatment and Outcome - no. (%) | IVIg                                              | 6 (75)                               | 10 (100)                                                                | 59 (76)                                             | 25 (71)                                                                | 144 (77)                                               |
|                                 | Systemic steroids                                 | 3 (37.5)                             | 8 (80)                                                                  | 57 (73)                                             | 12 (34)                                                                | 91 (49)                                                |
|                                 | Invasive mechanical ventilation                   | 1 (12.5)                             | 2 (20)                                                                  | 36 (46)                                             | 22 (62)                                                                | 37 (20)                                                |
|                                 | Anticoagulation                                   | 3 (37.5)                             | Not available                                                           | 7 (9)                                               | 23 (65)                                                                | 87 (47)                                                |
|                                 | ECMO                                              | 0 (0)                                | 0 (0)                                                                   | 3 (4)                                               | 10 (28)                                                                | 8 (4)                                                  |
|                                 | Intensive care unit                               | 2 (25)                               | 2 (20)                                                                  | 78 (100)                                            | 35 (100)                                                               | 148 (80)                                               |
|                                 | Deaths: n (%)                                     | 1 (12.5)                             | 0 (0)                                                                   | 2 (2.6)                                             | 0 (0)                                                                  | 4 (2)                                                  |

ECMO: Extracorporeal membrane oxygenation, GI: Gastrointestinal, IQR: interquartile range, IVIG: Intravenous immunoglobulin, KDSS: Kawasaki Disease Shock Syndrome, LV: Left ventricle, MIS-C: Multisystem Inflammatory Syndrome in Children, PIMS- TS: Paediatric Multisystem Inflammatory Syndrome–Temporally Associated with SARS-CoV-2, RT-PCR: Reverse transcriptase polymerase chain reaction
